# Supplementary material for: Targeted ultra performance liquid chromatography tandem mass spectrometry procedures for the diagnosis of inborn errors of metabolism: validation through ERNDIM external quality assessment schemes
Source: publisher site journal article supplement (doi:10.1515/cclm-2023-1291), 2024-03-08
Supplement: Supplementary file 1 [file j_cclm-2023-1291_suppl_001.docx]

**Supplementary text:**

**Calibration and internal quality control materials**

Calibration: For amino acid calibration, external standards were purchased from sigma (references: A-6407, A-6282 and 76523) and internal standards from Cambridge Isotope Laboratories, Inc., (reference: MSK-CAA-1). For acylcarnitines, calibration materials were purchased from Cambridge Isotope Laboratories, Inc., (external standard references NSK-BUS-1 and NSK-B-G1-US-1; internal stardard references NSK-B-1 and NSK-B-G1). For guanidinoacetate and creatine calibration, external standards were purchased from Sigma, (references G-6002 and. C-0780, respectively) and internal standards from Cambridge Isotope Laboratories, Inc., (references DLM-9998 and DLM-1302, respectively). For purines and pyrimidines calibration, external standards were prepared from materials purchased to MCA laboratories, a partner of ERNDIM (reference PUR-02.2) and Sigma (references 74005 and 94295) and internal standards from Cambridge Isotope Laboratories, Inc., (references NLM-4264-0, NLM-1048-0, NLM-3995-0, NLM-1698-0, and NLM-3902-0).

Internal quality control: For amino acids and acylcarnitines, internal quality control materials were purchased from the Foundation for Quality Assessment in Medical Laboratory Diagnostics (SKML: references AMI-02.1/AMI-02.2, and CAR-02.1/ CAR-02.2 respectively). For guanidinoacetate, creatine, purines, and, pyrimidines, control materials were purchased from MCA laboratories (references SAS-02.1, SAS-02.2, SAU-01.1, SAU-01.2, and PUR-02.1).

**ERNDIM information**

This information is provided on the ERNDIMQA website to describe the evaluation pararmeters of the quantitative schemes (www.ERNDIN.org).

**Accuracy:** A first approach to improve harmonization among laboratories, is to compare mean outcome in your lab of the eight samples with the mean outcome of all labs.

**Recovery:** A second approach to describe accuracy is the percentage recovery of added analyte. In this approach it is assumed that the recovery of the weighed quantities is the target value. The correlation between weighed quantities as added to the samples (on the x-axis) and your measured quantities (on the y-axis) has been calculated. The slope of the correlation multiplied by 100% is your recovery of the added amounts. Outcome for your lab in comparison to median outcome of all labs is shown in the column “Recovery” in the Annual Report.

**Precision:** Samples come in pairs which can be regarded as duplicates from which CV’s can be calculated (Intra laboratory CV as indicator for reproducibility). Outcome for your lab in comparison to the median of all labs is shown in column “Precision” of the Annual Report.

**Linearity;** With weighed quantities on the x-axis and your measured quantities on the y-axis the coefficient of regression (r) has been calculated. Outcome for your lab in comparison to the median of all labs is in the column “Linearity” of the annual report. **Interlab CV**: Part of the schemes’ design is to monitor the hartmoniation among techniques by calculating the Interlaboratory CV. This, along with the number of laboratories who submitted results, is shown in the column “Data all Labs” in the Annual Report.
