# Supplementary material for: Targeted ultra performance liquid chromatography tandem mass spectrometry procedures for the diagnosis of inborn errors of metabolism: validation through ERNDIM external quality assessment schemes
Source: publisher site journal article supplement (doi:10.1515/cclm-2023-1291), 2024-03-08
Supplement: Supplementary file 2 [file j_cclm-2023-1291_suppl_002.docx]

**Supplementary Table 1.** Precursor and product ion features (*m/z*), dwell time (DT in seconds), cone voltage (CV in Volts), collision energy (CE in eVolts), Electrospray ionization conditions (ESI) and the internal standards (IS) used are stated.

| **Acylcarnitines** | **Precursor ion (m/z)** | **Product ion (*m/z*)** | **DT (s)** | **CV (V)** | **CE (eV)** | **ESI Mode** | **IS** |
| --- | --- | --- | --- | --- | --- | --- | --- |
| Carnitine Free (C0) | 218.30 | 84.60 | 0.005 | 40 | 25 | positive | C0-D9 |
| C0-D9 | 227.26 | 84.60 | 0.005 | 40 | 25 | positive |  |
| Acetylcarnitine (C2) | 260.14 | 84.60 | 0.005 | 40 | 25 | positive | C2-D3 |
| C2-D3 | 263.48 | 84.60 | 0.005 | 40 | 25 | positive |  |
| Propionylcarnitine (C3) | 274.38 | 84.60 | 0.005 | 40 | 25 | positive | C3-D3 |
| C3-D3 | 277.27 | 84.60 | 0.005 | 40 | 25 | positive |  |
| Butyrylcarnitine (C4) | 288.32 | 84.60 | 0.005 | 40 | 25 | positive | C4-D3 |
| 3-OH-Butyrylcarnitine (C4-OH) | 304.48 | 84.60 | 0.005 | 40 | 25 | positive | C4-D3 |
| C4-D3 | 291.22 | 84.60 | 0.005 | 40 | 25 | positive |  |
| Tiglylcarnitine (C5:1) | 300.58 | 84.60 | 0.005 | 40 | 25 | positive | C5-D9 |
| Isovalerylcarnitine (C5) | 302.34 | 84.60 | 0.005 | 40 | 25 | positive | C5-D9 |
| C5-D9 | 311.41 | 84.60 | 0.005 | 40 | 25 | positive |  |
| 3-OH-Isovalerylcarnitine (C5-OH) | 318.40 | 84.60 | 0.005 | 40 | 25 | positive | C5-OH-D3 |
| C5-OH-D3 | 321.87 | 84.60 | 0.005 | 40 | 25 | positive |  |
| Hexanoylcarnitine (C6) | 316.45 | 84.60 | 0.005 | 40 | 25 | positive | C8-D3 |
| Octanoylcarnitine (C8) | 344.16 | 84.60 | 0.005 | 40 | 25 | positive | C8-D3 |
| C8-D3 | 347.50 | 84.60 | 0.005 | 40 | 25 | positive |  |
| Decanoylcarnitine (C10) | 372.57 | 84.60 | 0.005 | 40 | 25 | positive | C8-D3 |
| Dodecanoylcarnitine (C12) | 400.40 | 84.60 | 0.005 | 40 | 25 | positive | C12-D9 |
| C12-D9 | 409.11 | 84.60 | 0.005 | 40 | 25 | positive |  |
| cis-5-Tetradecenoylcarnitine (C14:1) | 426.40 | 84.60 | 0.005 | 40 | 25 | positive | C8-D3 |
| Palmitoylcarnitine (C16) | 456.60 | 84.60 | 0.005 | 40 | 25 | positive | C16-D3 |
| C16-D3 | 459.60 | 84.60 | 0.005 | 40 | 25 | positive |  |
| 3-OH-Palmitoylcarnitine (C16:OH) | 472.47 | 84.60 | 0.005 | 40 | 25 | positive | C16-OH-D3 |
| C16-OH-D3 | 475.47 | 84.60 | 0.005 | 40 | 25 | positive |  |
| Oleoylcarnitine (C18:1) | 482.30 | 84.60 | 0.005 | 40 | 25 | positive | C16-D3 |
| Stearoylcarnitine (C18) | 484.51 | 84.60 | 0.005 | 40 | 25 | positive | C18-D3 |
| C18-D3 | 487.66 | 84.60 | 0.005 | 40 | 25 | positive |  |
| 3-OH-Stearoylcarnitine (C18-OH) | 500.70 | 84.60 | 0.005 | 40 | 25 | positive | C16-D3 |
| Malonylcarnitine (C3-DC) | 360.64 | 84.60 | 0.005 | 40 | 25 | positive | C5-D9 |
| Methylmalonylcarnitine (C4-DC) | 374.52 | 84.60 | 0.005 | 40 | 25 | positive | C8-D3 |
| Glutarylcarnitine (C5-DC) | 388.32 | 84.60 | 0.005 | 40 | 25 | positive | C5DC-D3 |
| C5DC-D3 | 391.47 | 84.60 | 0.005 | 40 | 25 | positive |  |
| **Purines/pyrimidines** | | | | | | | |
| Adenine | 136.00 | 92.00 | 0.005 | 66 | 24 | positive | Thymine 15N2 |
| Adenosine | 268.20 | 119.00 | 0.005 | 30 | 44 | positive | Thymine 15N2 |
| AICAR | 259.00 | 110.10 | 0.005 | 26 | 22 | positive | Orotic Acid 15N2 |
| Deoxy-adenosine | 252.10 | 119.00 | 0.005 | 18 | 38 | positive | Thymine 15N2 |
| Deoxy-guanosine | 266.10 | 150.00 | 0.005 | 54 | 20 | negative | Inosine 15N4 |
| Deoxy-inosine | 251.10 | 135.10 | 0.005 | 56 | 22 | negative | Inosine 15N4 |
| Deoxy-uridine | 227.00 | 184.10 | 0.005 | 44 | 12 | negative | Thymine 15N2 |
| Dihydro-thymine | 129.00 | 112.00 | 0.005 | 34 | 10 | positive | Thymine 15N2 |
| Dihydro-uracil | 115.00 | 73.00 | 0.005 | 40 | 10 | positive | Orotic Acid 15N2 |
| Guanosine | 282.10 | 150.00 | 0.005 | 48 | 18 | negative | Inosine 15N4 |
| Hypoxanthine | 137.10 | 110.10 | 0.005 | 42 | 18 | positive | Xanthine 15N2 |
| **Purines/pyrimidines** | **Precursor ion (m/z)** | **Product ion (*m/z*)** | **DT (s)** | **CV (V)** | **CE (eV)** | **ESI Mode** | **IS** |
| Inosine | 267.10 | 135.10 | 0.005 | 58 | 20 | negative | Inosine 15N4 |
| Orotic Acid | 155.00 | 111.00 | 0.005 | 34 | 10 | negative | Orotic Acid 15N2 |
| Pseudo-uridine | 243.00 | 153.00 | 0.005 | 36 | 12 | negative | Orotic Acid 15N2 |
| Thymidine | 141.00 | 42.00 | 0.005 | 44 | 12 | negative | Thymidine 13C10 13N2 |
| Thymine | 127.00 | 110.00 | 0.005 | 50 | 16 | positive | Thymine 15N2 |
| Uracil | 113.00 | 70.00 | 0.005 | 50 | 14 | positive | Orotic Acid 15N2 |
| Xanthine | 153.00 | 110.10 | 0.005 | 26 | 18 | positive | Xanthine 15N2 |
| Uric Acid | 166.84 | 95.96 | 0.005 | 42 | 16 | negative | Orotic Acid: H2O 1,3-15N2 |
| Inosine 15N4 | 271.10 | 139.10 | 0.005 | 20 | 20 | negative |  |
| Orotic Acid: H2O 1,3-15N2 | 157.00 | 113.10 | 0.005 | 30 | 10 | negative |  |
| Thymidine 13C10 | 235.10 | 44.10 | 0.005 | 30 | 12 | negative |  |
| Thymine 1,3-15N2 | 129.00 | 111.00 | 0.005 | 50 | 15 | positive |  |
| Xanthine 1,3-15N2 | 155.10 | 137.10 | 0.005 | 20 | 14 | positive |  |
| **Creatine/guanidinoacetate** | | | | | | | |
| Creatine | 188.00 | 90.00 | 0.080 | 18 | 18 | positive | Creatine-D3 |
| Creatine - D3 | 191.00 | 93.00 | 0.080 | 18 | 18 | positive |  |
| Guanidinoacetate | 174.00 | 101.00 | 0.080 | 12 | 15 | positive | GAA-D2 |
| Guanidinoacetate - D2 | 176.00 | 103.00 | 0.080 | 12 | 15 | positive |  |
| **Oligosaccharides (disorders)** | | | | | | | |
| Hex2 (SASD) | 673 | 175 | 0.019 | 33 | 40 | positive | n.a |
| NeuAcGc-HexNAc-Hex3 (SASD) | 1345 | 175 | 0.019 | 33 | 40 | positive | n.a |
| Fuc-GlcNAc (Fucosidosis) | 698 | 175 | 0.019 | 33 | 40 | positive | n.a |
| GlcNAc-Man (Beta-mannosidosis) | 714 | 175 | 0.019 | 33 | 40 | positive | n.a |
| GlcNAc-Man2 (Alpha-mannosidosis) | 876 | 175 | 0.019 | 33 | 40 | positive | n.a |
| GlcNAc-Man3 (Alpha-mannosidosis) | 1038 | 175 | 0.019 | 33 | 40 | positive | n.a |
| GlcNAc-Man4 (Alpha-mannosidosis) | 1200 | 175 | 0.019 | 33 | 40 | positive | n.a |
| Glc4 (Pompe) | 998 | 175 | 0.019 | 33 | 40 | positive | n.a |
| Glc6 (Pompe) | 1322 | 175 | 0.019 | 33 | 40 | positive | n.a |
| Hex2-HexNAc2 (Sandhoff (GM2)) | 1080 | 175 | 0.019 | 33 | 40 | positive | n.a |
| Hex3-HexNAc3 (Sandhoff (GM2)) | 1445 | 175 | 0.019 | 33 | 40 | positive | n.a |
| Man3-Gal-GlcNAc2 (Gangliosidosis (GM 1) | 1242 | 175 | 0.019 | 33 | 40 | positive | n.a |
| NeuAcGal-GlcNAc-Man2-GlcNAc (MLP/Galactosialidosis) | 1533 | 175 | 0.019 | 33 | 40 | positive | n.a |

**Supplementary Table 2.** From theERNDIM results, we calculated relative measurement error (% RME) and confidence intervals (CI). Accurarcy (compared with the mean values from the other participants), and interlaboratory coefficient of variation (%), are also stated.

|  | **2021** | | | | | | |
| --- | --- | --- | --- | --- | --- | --- | --- |
|  | **Accuracy**  **(mean)** | | | **Confidence interval** | |  | |
|  |
| **Serum amino acids** | **Your Lab** | **All labs** | **(RME) %** | **Lower limit** | **Upper limit** | **SD** | **interlab %CV** |
| 2-Aminobutyric acid | 38.40 | 39.1 | -1.79 | 29.1 | 49.1 | 5.08 | 13.0 |
| Alanine | 684 | 705 | -2.98 | 570 | 840 | 69.0 | 9.79 |
| Arginine | 211 | 210 | 0.48 | 172 | 248 | 19.2 | 9.12 |
| Asparagine | 82.4 | 68.6 | 20.12 | 40.6 | 96.6 | 14.3 | 20.8 |
| Aspartic Acid | 48.6 | 56.2 | -13.52 | 37.8 | 74.6 | 9.39 | 16.7 |
| Citrulline | 681 | 721 | -5.55 | 509 | 933 | 108 | 15.0 |
| Cystine | 51.6 | 53.6 | -3.73 | 40.3 | 66.9 | 6.81 | 12.7 |
| Glutamic acid | 137 | 131 | 4.58 | 105 | 157 | 13.5 | 10.3 |
| Glutamine | 825 | 866 | -4.73 | 673 | 1059 | 98.7 | 11.4 |
| Glycine | 676 | 718 | -5.85 | 584 | 852 | 68.3 | 9.51 |
| Histidine | 81.8 | 93.3 | -12.3 | 76.7 | 110 | 8.48 | 9.09 |
| Hydroxyproline | 16.5 | 19.3 | -14.5 | 10.8 | 27.8 | 4.32 | 22.4 |
| Isoleucine | 519 | 512 | 1.37 | 399 | 625 | 57.9 | 11.3 |
| Leucine | 517 | 524 | -1.34 | 399 | 649 | 63.9 | 12.2 |
| Lysine | 363 | 371 | -2.16 | 304 | 438 | 34.4 | 9.28 |
| Methionine | 319 | 328 | -2.74 | 252 | 404 | 38.7 | 11.8 |
| Ornithine | 328 | 343 | -4.37 | 274 | 412 | 35.0 | 10.2 |
| Phenylalanine | 536 | 533 | 0.56 | 442 | 624 | 46.2 | 8.67 |
| Proline | 356 | 356 | 0.00 | 288 | 424 | 34.6 | 9.71 |
| Serine | 193 | 201 | -3.98 | 165 | 237 | 18.6 | 9.25 |
| Taurine | 166 | 165 | 0.61 | 129 | 201 | 18.2 | 11.0 |
| Threonine | 269 | 280 | -3.93 | 236 | 324 | 22.6 | 8.08 |
| Tryptophan | 125 | 116 | 7.76 | 81.4 | 151 | 17.6 | 15.2 |
| Tyrosine | 292 | 291 | 0.34 | 239 | 343 | 26.6 | 9.15 |
| Valine | 282 | 288 | -2.08 | 244 | 332 | 22.5 | 7.80 |
| **DBS amino acids** | | | | | | | |
| Isoleucine | 480 | 467 | 2.78 | 311 | 623 | 79.4 | 17.0 |
| Leucine | 287 | 289 | -0.69 | 177 | 401 | 57.2 | 19.8 |
| Methionine | 132 | 126 | 4.76 | 73.4 | 179 | 26.8 | 21.3 |
| Phenylalanine | 436 | 405 | 7.65 | 272 | 538 | 67.6 | 16.7 |
| Tyrosine | 309 | 288 | 7.29 | 191 | 385 | 49.2 | 17.1 |
| Valine | 248 | 242 | 2.48 | 142 | 342 | 51.1 | 21.1 |
| **Serum acylcarnitines** | | | | | | | |
| Carnitine Free (C0) | 55.0 | 66.0 | -16.7 | 50.2 | 81.8 | 8.05 | 12.2 |
| Acetylcarnitine (C2) | 23.0 | 20.7 | 11.1 | 12.0 | 29.4 | 4.43 | 21.4 |
| Propionylcarnitine (C3) | 6.07 | 6.29 | -3.50 | 3.84 | 8.74 | 1.25 | 19.9 |
| Butyrylcarnitine (C4) | 2.05 | 2.21 | -7.24 | 1.41 | 3.01 | 0.41 | 18.5 |
| 3-OH-Butyrylcarnitine (C4-OH) | 1.0 | 1.0 | 0.00 | 0.07 | 1.93 | 0.48 | 47.7 |
| Tiglylcarnitine (C5:1) | 0.839 | 0.661 | 26.9 | 0.24 | 1.08 | 0.22 | 32.7 |
| Isovalerylcarnitine (C5) | 2.43 | 2.41 | 0.83 | 1.64 | 3.18 | 0.39 | 16.2 |
| 3-OH-Isovalerylcarnitine (C5-OH) | 0.854 | 1.23 | -30.6 | 0.49 | 1.97 | 0.38 | 30.8 |
| Hexanoylcarnitine (C6) | 0.681 | 0.762 | -10.6 | 0.32 | 1.20 | 0.22 | 29.3 |
| Octanoylcarnitine (C8) | 1.9 | 1.98 | -4.04 | 1.14 | 2.82 | 0.43 | 21.6 |
|  | **2021** | | | | | | |
| **Accuracy**  **(mean)** | | | **Confidence interval** | |  | |
| **Serum acylcarnitines** | **Your Lab** | **All labs** | **(RME) %** | **Lower limit** | **Upper limit** | **SD** | **interlab %CV** |
| Decanoylcarnitine (C10) | 1.84 | 1.84 | 0.00 | 0.93 | 2.75 | 0.46 | 25.1 |
| Dodecanoylcarnitine (C12) | 1.57 | 1.63 | -3.68 | 0.99 | 2.27 | 0.33 | 20.1 |
| cis-5-Tetradecenoylcarnitine (C14:1) | 1.01 | 1.21 | -16.5 | 0.64 | 1.78 | 0.29 | 24.1 |
| Palmitoylcarnitine (C16) | 1.46 | 1.59 | -8.18 | 1.12 | 2.06 | 0.24 | 15.1 |
| 3-OH-Palmitoylcarnitine (C16:OH) | 0.196 | 0.184 | 6.52 | 0.05 | 0.32 | 0.07 | 36.9 |
| Oleoylcarnitine (C18:1) | 0.679 | 0.591 | 14.9 | 0.31 | 0.87 | 0.14 | 23.9 |
| Stearoylcarnitine (C18) | 0.596 | 0.609 | -2.13 | 0.36 | 0.85 | 0.12 | 20.5 |
| 3-OH-Stearoylcarnitine (C18-OH) | 0.218 | 0.232 | -6.03 | 0.02 | 0.45 | 0.11 | 46.9 |
| Malonylcarnitine (C3-DC) | 0.235 | 0.414 | -43.2 | 0.01 | 0.81 | 0.20 | 49.2 |
| Methylmalonylcarnitine (C4-DC) | 0.181 | 0.389 | -53.5 | -0.11 | 0.89 | 0.25 | 65.5 |
| Glutarylcarnitine (C5-DC) | 1.05 | 0.878 | 19.6 | -0.11 | 1.86 | 0.50 | 57.2 |
| **Urine GAA/creatine** | | | | | | | |
| Creatine | 972 | 1081 | -10.1 | 825 | 1337 | 131 | 12.1 |
| Guanidinoacetate | 391 | 451 | -13.3 | 347 | 555 | 53.2 | 11.8 |
| **Serum GAA/creatine** |  |  |  |  |  |  |  |
| Creatine | 78.3 | 70.8 | 10.6 | 58.3 | 83.3 | 6.36 | 8.99 |
| Guanidino acetic acid | 9.29 | 11.7 | -20.6 | 9.27 | 14.1 | 1.24 | 10.6 |
| **Urine purines and pyrimidines** | | | | | | | |
| Adenine | OR (out of range) | 38.3 |  | 26.3 | 50.3 | 6.13 | 16.0 |
| Adenosine | 45.4 | 43.4 | 4.61 | 34.0 | 52.8 | 4.77 | 11.0 |
| AICAR | 23.4 | 21.2 | 10.4 | 14.6 | 27.8 | 3.37 | 15.9 |
| Deoxy-adenosine | 23.7 | 22 | 7.73 | 14.9 | 29.1 | 3.61 | 16.4 |
| Deoxy-guanosine | 28.8 | 21.4 | 34.6 | 13.7 | 29.1 | 3.92 | 18.3 |
| Deoxy-inosine | 22.8 | 22.2 | 2.70 | 15.6 | 28.8 | 3.35 | 15.1 |
| Deoxy-uridine | 21.7 | 19.8 | 9.60 | 14.1 | 25.5 | 2.91 | 14.7 |
| Dihydro-thymine | 51.4 | 48.4 | 6.20 | 37.6 | 59.2 | 5.52 | 11.4 |
| Dihydro-uracil | 67.9 | 52.3 | 29.8 | 30.1 | 74.5 | 11.3 | 21.7 |
| Guanosine | 22.0 | 20.5 | 7.32 | 15.1 | 25.9 | 2.77 | 13.5 |
| Hypoxanthine | 78.9 | 71.6 | 10.2 | 53.8 | 89.4 | 9.09 | 12.7 |
| Inosine | 71.9 | 60.5 | 18.8 | 45.8 | 75.2 | 7.50 | 12.4 |
| Orotic Acid | 53.4 | 48.2 | 10.8 | 36.6 | 59.8 | 5.93 | 12.3 |
| Pseudo-uridine | 86.2 | 86.8 | -0.69 | 69.6 | 104 | 8.77 | 10.1 |
| Thymidine | 19.6 | 20.2 | -2.97 | 12.7 | 27.7 | 3.82 | 18.9 |
| Thymine | 67.1 | 61.9 | 8.40 | 43.1 | 80.7 | 9.59 | 15.5 |
| Uracil | 90.6 | 85.9 | 5.47 | 63.3 | 108 | 11.5 | 13.4 |
| Xanthine | 75.6 | 74.7 | 1.20 | 56.4 | 93.0 | 9.34 | 12.5 |

|  | **2022** | | | | | | | | | |
| --- | --- | --- | --- | --- | --- | --- | --- | --- | --- | --- |
| **Accuracy (mean)** | | | **Confidence interval** | | | |  | | |
| **Serum amino acids** | **Your Lab** | **All labs** | **RME (%)** | **Lower limit** | **Upper limit** | | **SD** | | **interlab %CV** | |
| 2-Aminobutyric acid | 42.0 | 39.4 | 6.60 | 29.4 | 49.4 | | 5.12 | | 13.0 | |
| Alanine | 713 | 741 | -3.78 | 617 | 865 | | 63.4 | | 8.55 | |
| Arginine | 227 | 233 | -2.58 | 186 | 280 | | 23.8 | | 10.2 | |
| Asparagine | 83.8 | 54.4 | 54.0 | 32.1 | 76.7 | | 11.4 | | 20.9 | |
| Aspartic Acid | 39.1 | 48.9 | -20.0 | 32.4 | 65.4 | | 8.41 | | 17.2 | |
| Citrulline | 526 | 583 | -9.78 | 442 | 724 | | 71.7 | | 12.3 | |
| Cystine | 48.9 | 48.2 | 1.45 | 36.7 | 59.7 | | 5.88 | | 12.2 | |
| Glutamic acid | 247 | 247 | 0.00 | 198 | 296 | | 24.9 | | 10.1 | |
| Glutamine | 679 | 742 | -8.49 | 592 | 892 | | 76.4 | | 10.3 | |
| Glycine | 681 | 737 | -7.60 | 607 | 867 | | 66.5 | | 9.03 | |
| Histidine | 42.1 | 50.9 | -17.3 | 40.6 | 61.2 | | 5.24 | | 10.3 | |
| Hydroxyproline | 16.1 | 19.8 | -18.7 | 11.4 | 28.2 | | 4.30 | | 21.7 | |
| Isoleucine | 584 | 563 | 3.73 | 437 | 689 | | 64.2 | | 11.4 | |
| Leucine | 802 | 786 | 2.04 | 643 | 929 | | 73.1 | | 9.30 | |
| Lysine | 365 | 384 | -4.95 | 319 | 449 | | 33.1 | | 8.63 | |
| Methionine | 227 | 246 | -7.72 | 190 | 302 | | 28.5 | | 11.6 | |
| Ornithine | 358 | 386 | -7.25 | 317 | 455 | | 34.9 | | 9.06 | |
| Phenylalanine | 600 | 595 | 0.84 | 481 | 709 | | 58.3 | | 9.80 | |
| Proline | 357 | 372 | -4.03 | 303 | 441 | | 35.3 | | 9.50 | |
| Serine | 174 | 181 | -3.87 | 151 | 211 | | 15.5 | | 8.55 | |
| Taurine | 136 | 153 | -11.1 | 123 | 183 | | 15.3 | | 10.0 | |
| Threonine | 276 | 287 | -3.83 | 243 | 331 | | 22.4 | | 7.80 | |
| Tryptophan | 103 | 97 | 5.97 | 71.3 | 123 | | 13.2 | | 13.6 | |
| Tyrosine | 482 | 472 | 2.12 | 389 | 555 | | 42.4 | | 8.99 | |
| Valine | 285 | 298 | -4.36 | 251 | 345 | | 23.8 | | 8.00 | |
| **DBS amino acids** | | | | | | | | | | |
| Isoleucine | 436 | 408 | 6.86 | 269 | 547 | | | 70.9 | | 17.4 |
| Leucine | 645 | 645 | 0.00 | 354 | 936 | | | 148 | | 23.0 |
| Methionine | 164 | 156 | 5.13 | 90.0 | 222 | | | 33.7 | | 21.6 |
| Phenylalanine | 1045 | 977 | 6.96 | 592 | 1362 | | | 196 | | 20.1 |
| Tyrosine | 510 | 459 | 11.1 | 304 | 614 | | | 78.9 | | 17.2 |
| Valine | 356 | 340 | 4.71 | 189 | 491 | | | 76.8 | | 22.6 |
| **Serum acylcarnitines** | | | | | | | | | | |
| Carnitine Free (C0) | 54.6 | 61.4 | -11.1 | 44.7 | 78.1 | | | 8.53 | | 13.9 |
| Acetylcarnitine (C2) | 23.4 | 19.2 | 21.9 | 11.4 | 27.0 | | | 3.97 | | 20.7 |
| Propionylcarnitine (C3) | 5.95 | 6.40 | -7.03 | 3.78 | 9.02 | | | 1.34 | | 20.9 |
| Butyrylcarnitine (C4) | 2.14 | 2.32 | -7.76 | 1.57 | 3.07 | | | 0.39 | | 16.6 |
| 3-OH-Butyrylcarnitine (C4-OH) | 1.00 | 1.05 | -5.14 | -0.04 | 2.14 | | | 0.56 | | 53.2 |
| Tiglylcarnitine (C5:1) | 0.73 | 0.71 | 2.95 | 0.35 | 1.07 | | | 0.18 | | 25.8 |
| Isovalerylcarnitine (C5) | 2.42 | 2.46 | -1.63 | 1.71 | 3.21 | | | 0.38 | | 15.6 |
| 3-OH-Isovalerylcarnitine (C5-OH) | 1.27 | 1.32 | -3.79 | 0.42 | 2.22 | | | 0.46 | | 34.7 |
| Hexanoylcarnitine (C6) | 0.57 | 0.81 | -28.8 | 0.34 | 1.27 | | | 0.24 | | 29.6 |
| Octanoylcarnitine (C8) | 1.90 | 2.07 | -8.21 | 1.09 | 3.05 | | | 0.50 | | 24.1 |
| Decanoylcarnitine (C10) | 1.73 | 1.90 | -8.95 | 0.85 | 2.95 | | | 0.54 | | 28.3 |
| Dodecanoylcarnitine (C12) | 2.05 | 2.23 | -8.07 | 1.31 | 3.15 | | | 0.47 | | 21.1 |
|  | **2022** | | | | | | | | | |
| **Accuracy**  **(mean)** | | | **Confidence interval** | | | |  | | |
| **Serum acylcarnitines** | **Your Lab** | **All labs** | **RME (%)** | **Lower limit** | | **Upper limit** | | **SD** | | **interlab %CV** |
| cis-5-Tetradecenoylcarnitine (C14:1) | 0.74 | 0.97 | -23.3 | 0.53 | | 1.41 | | 0.22 | | 23.1 |
| Palmitoylcarnitine (C16) | 1.51 | 1.61 | -6.21 | 1.15 | | 2.07 | | 0.24 | | 14.6 |
| 3-OH-Palmitoylcarnitine (C16:OH) | 0.43 | 0.41 | 4.84 | 0.06 | | 0.76 | | 0.18 | | 43.4 |
| Oleoylcarnitine (C18:1) | 0.58 | 0.60 | -2.35 | 0.30 | | 0.89 | | 0.15 | | 25.4 |
| Stearoylcarnitine (C18) | 0.59 | 0.64 | -8.27 | 0.38 | | 0.91 | | 0.14 | | 21.1 |
| 3-OH-Stearoylcarnitine (C18-OH) | 0.40 | 0.43 | -7.69 | 0.04 | | 0.82 | | 0.20 | | 46.2 |
| Malonylcarnitine (C3-DC) | 0.30 | 0.42 | -27.9 | -0.06 | | 0.89 | | 0.24 | | 58.7 |
| Methylmalonylcarnitine (C4-DC) | 0.29 | 0.41 | -29.9 | -0.06 | | 0.88 | | 0.24 | | 58.7 |
| Glutarylcarnitine (C5-DC) | 1.07 | 0.91 | 17.9 | -0.02 | | 1.83 | | 0.47 | | 52.0 |
| **Urine GAA/creatine** | | | | | | | | | | |
| Creatine | 977 | 1045 | -6.51 | 850 | | 1239 | | 99.3 | | 9.50 |
| Guanidinoacetate | 402 | 445 | -9.66 | 358 | | 531 | | 44.1 | | 9.91 |
| **Serum GAA/creatine** | | | | | | | | | | |
| Creatine | 73.4 | 67.5 | 8.74 | 55.9 | | 79.1 | | 5.91 | | 8.76 |
| Guanidino acetic acid | 10.5 | 12.3 | -14.6 | 9.82 | | 14.8 | | 1.27 | | 10.3 |
| **Urine purines and pyrimidines** | | | | | | | | | | |
| Adenine | 37.7 | 41.5 | -9.16 | 28.2 | | 54.8 | | 6.81 | | 16.4 |
| Adenosine | 44.3 | 43.7 | 1.37 | 35.4 | | 52.0 | | 4.21 | | 9.64 |
| AICAR | 20.2 | 21.4 | -5.61 | 15.2 | | 27.6 | | 3.15 | | 14.7 |
| Deoxy-adenosine | 23.4 | 22.8 | 2.63 | 16.1 | | 29.5 | | 3.40 | | 14.9 |
| Deoxy-guanosine | 20.0 | 21.4 | -6.54 | 15.2 | | 27.6 | | 3.19 | | 14.9 |
| Deoxy-inosine | 23.0 | 21.5 | 6.98 | 15.0 | | 28.0 | | 3.31 | | 15.4 |
| Deoxy-uridine | 20.1 | 20.1 | 0.00 | 14.0 | | 26.2 | | 3.12 | | 15.5 |
| Dihydro-thymine | 50.7 | 47.3 | 7.19 | 36.5 | | 58.1 | | 5.49 | | 11.6 |
| Dihydro-uracil | 56.3 | 50.9 | 10.6 | 34.9 | | 66.9 | | 8.14 | | 16.0 |
| Guanosine | 21.0 | 20.3 | 3.45 | 14.2 | | 26.4 | | 3.13 | | 15.4 |
| Hypoxanthine | 77.4 | 70.0 | 10.6 | 54.9 | | 85.1 | | 7.70 | | 11.0 |
| Inosine | 75.8 | 62.4 | 21.5 | 49.6 | | 75.2 | | 6.55 | | 10.5 |
| Orotic Acid | 49.9 | 48.0 | 3.96 | 36.4 | | 59.6 | | 5.90 | | 12.3 |
| Pseudo-uridine | 72.6 | 87.0 | -16.5 | 66.0 | | 108 | | 10.7 | | 12.3 |
| Thymidine | 23.2 | 19.8 | 17.2 | 13.5 | | 26.1 | | 3.23 | | 16.3 |
| Thymine | 66.9 | 62.7 | 6.70 | 47.5 | | 77.9 | | 7.77 | | 12.4 |
| Uracil | 78.3 | 83.9 | -6.67 | 63.2 | | 105 | | 10.6 | | 12.6 |
| Xanthine | 73.0 | 71.2 | 2.53 | 58.0 | | 84.4 | | 6.75 | | 9.48 |
